# Supplementary material for: Estrogen regulates miRNA expression: implication of estrogen receptor and miR-124/AKT2 in tumor growth and angiogenesis
Source: PubMed Central journal article supplement (PMC5095050; doi:10.18632/oncotarget.9230), 2016-05-09
Supplement: oncotarget-07-36940-s001.pdf [file oncotarget-07-36940-s001.pdf]

## Estrogen regulates miRNA expression: implication of estrogen receptor and miR-124/AKT2 in tumor growth and angiogenesis

### SUPPLEMENTARY FIGURES

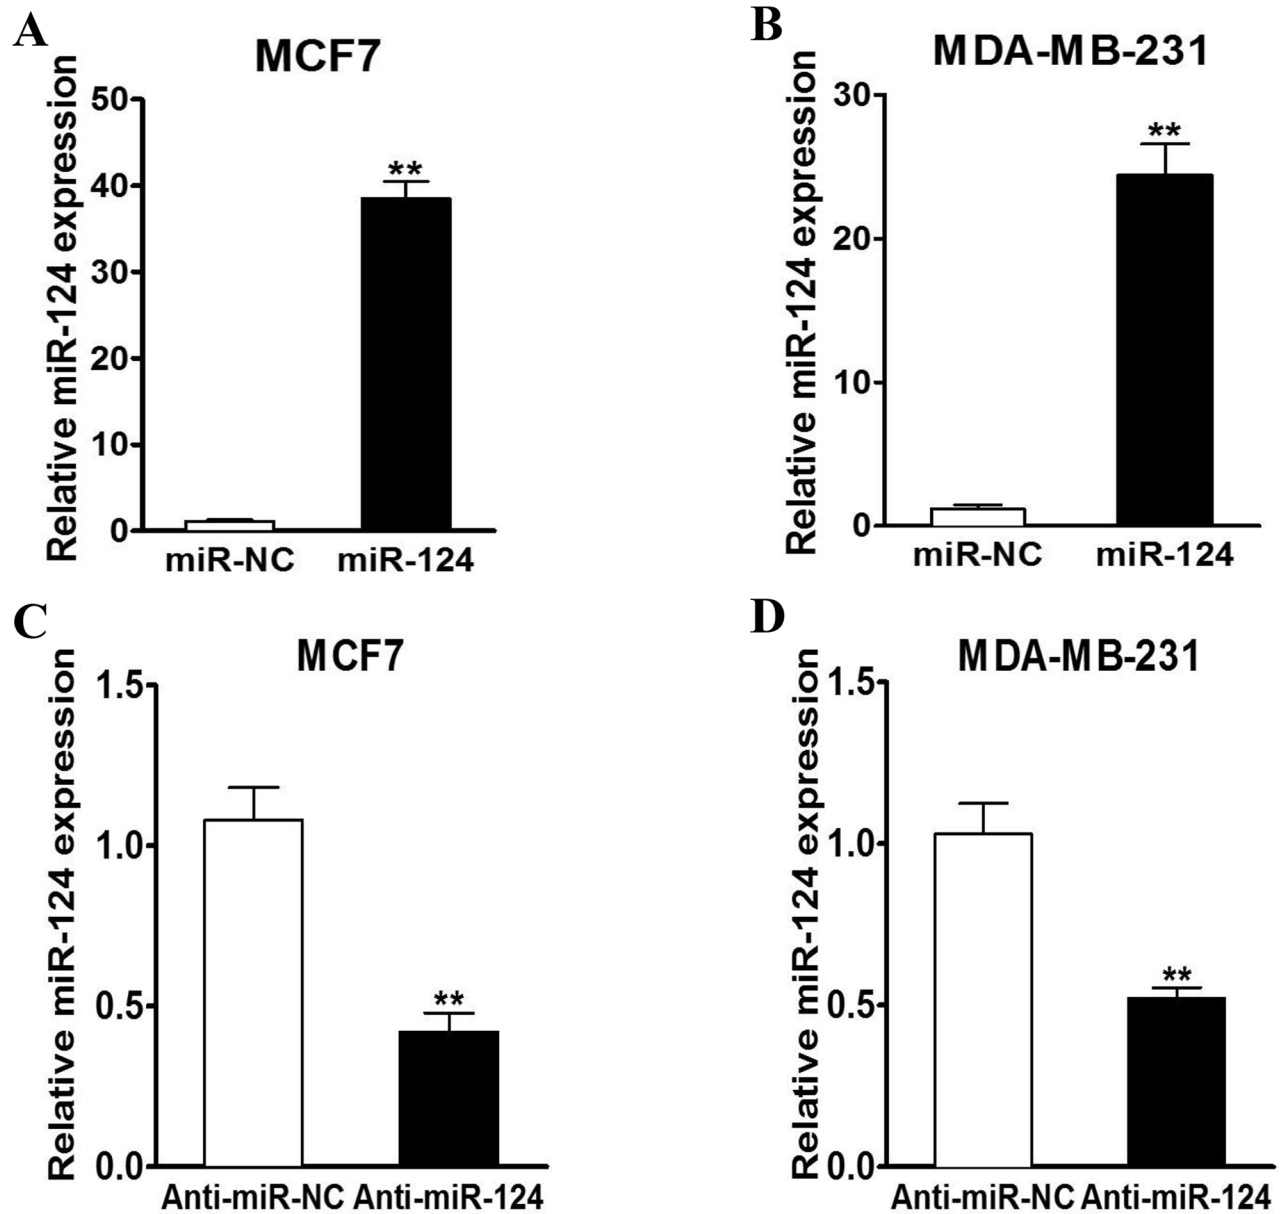

Supplementary Figure S1: The expression levels of miR-124 are significantly changed by miR-124 mimics or antagonists in BC cells. **A.** and **B.** MCF7 and MDA-MB-231 cells were transfected with miR-124 mimics or miR-NC, **C.** and **D.** and miR-124 inhibitor (Anti-miR-124), or control anti-sense RNA inhibitor (Anti-miR-NC). The expression levels of miR-124 were analyzed by qRT-PCR and U6 levels were used as internal control, represented the ratio to control group. Data were presented as the means  $\pm$  SD from three independent experiments with triple replicates per experiment. \* indicates significant difference compared to control at  $P < 0.05$ .

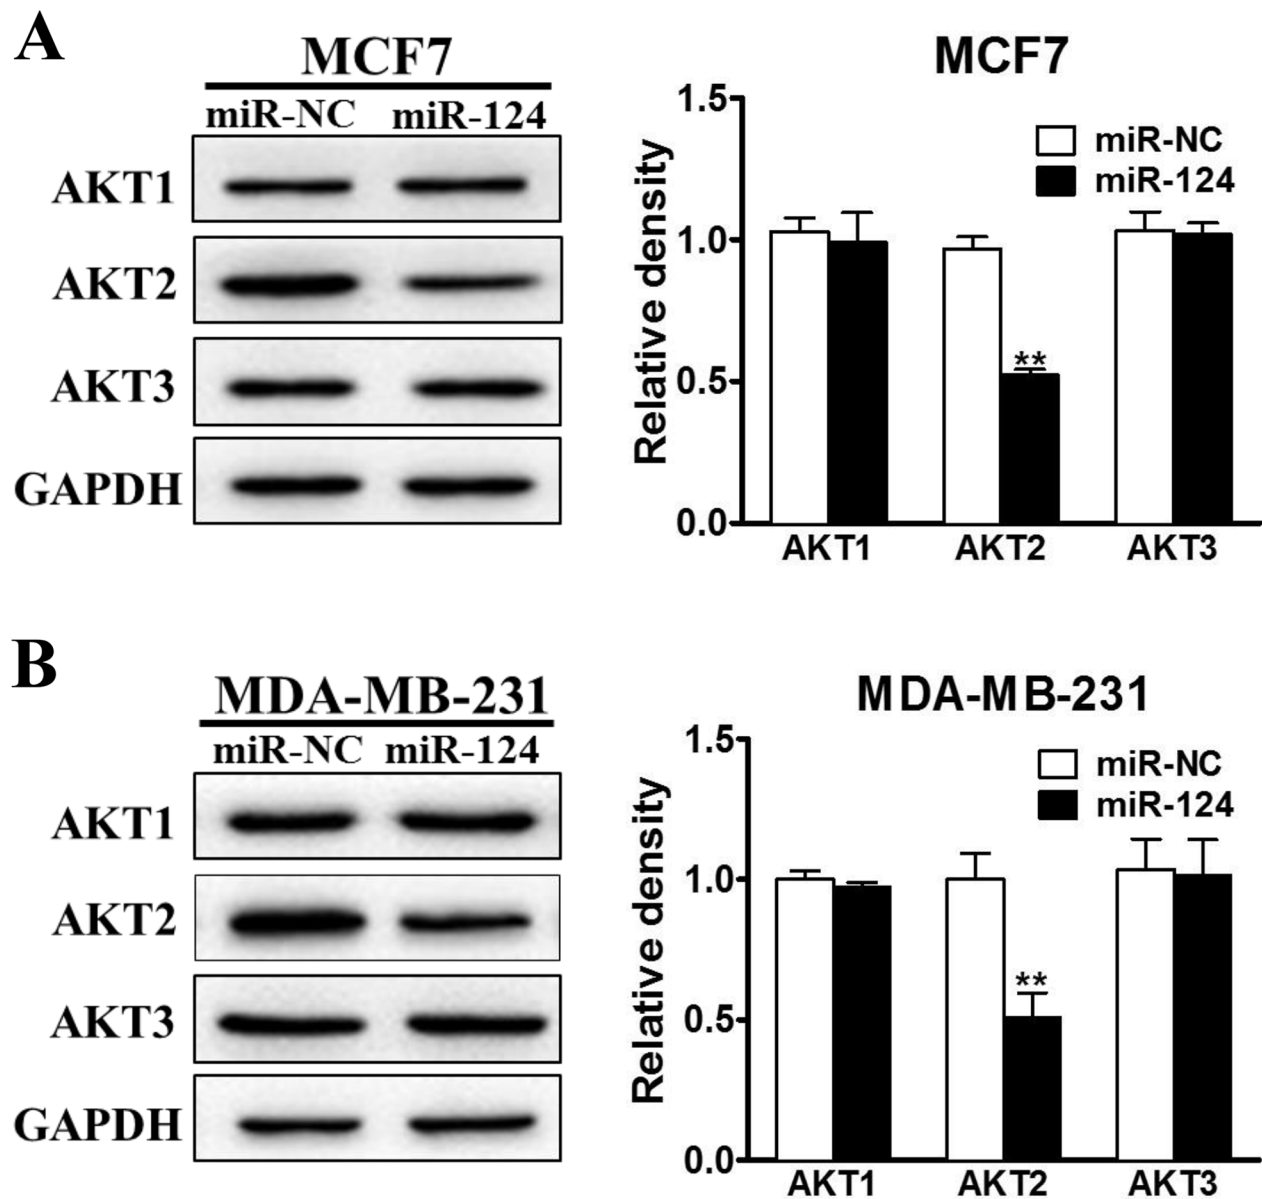

**Supplementary Figure S2: miR-124 suppresses the expression levels of AKT2, but not AKT1 and AKT3.** A. The expression levels of AKT1, AKT2, AKT3 and GAPDH were determined using immunoblotting in MCF7 and MDA-MB-231 cells overexpressing miR-124 and miR-NC. The density of protein levels of above was quantified by ImageJ software and GAPDH levels were used as internal control, and normalized to the values of miR-NC control. Data were presented as the means  $\pm$  SD from three independent experiments with triple replicates per experiment. \*\* indicates significant difference compared to miR-NC group at  $P < 0.01$ .
